# Supplementary material
Source: HighWire-hosted journal article supplement (https://rc.rcjournal.com/highwire/filestream/11927/field_highwire_adjunct_files/0/RC-02229.R3_Lofaso_Suppl.pdf)
Supplement: RC-02229.R3_Lofaso_Suppl.pdf [file RC-02229.R3_Lofaso_Suppl.pdf]

# Long term mechanical ventilation equipment for neuromuscular patients: meeting the expectations of patients and prescribers

Online depository

## Questionnaire for patients and prescribers

**What are the important parameters while mechanically ventilated ?**

**Ventilator/patient synchronization : ensure that the ventilator follow the respiratory rhythm of patients at the closest even if cycles are less regular :**

EVA: not important | | | | | | | | | | very important

**Correcting alveolar hypoventilation (greater effectiveness): even at the expense of comfort**

EVA: not important | | | | | | | | | | very important

**Comfort : even at the expense of efficiency of ventilation**

EVA: not important | | | | | | | | | | very important

**Is it important to allow patient to change some ventilation settings by himself in accordance with their needs ?**

EVA: not important | | | | | | | | | | very important

**Would you think of a mode allowing assistance to cough could be added on the ventilator?**

EVA : useless | | | | | | | | | | very useful

**If there were such a mode on a ventilator, would you be interested in allowing the patient to start it when needed ?**

EVA : not interested | | | | | | | | | | very interested

**Would it be important for the patient to have a contactor for providing larger inspiratory volumes for coughing ?**

EVA : not important | | | | | | | | | | very important

**What do you expect from a circuit ? Rank by importance (1 = most importance)**

Compact

Good length

Easy to assemble

Secure (difficult to disconnect)

Single limb (only one tubing)

Low weight

**Getting a humidification system is:**

EVA : not important | | | | | | | | | | very important

**Heating the ventilator circuit is:**

EVA: not important | | | | | | | | | | very important

**Shall the humidifier be integrated to the ventilator?**

a) ☐ yes

b) ☐ no

c) ☐ don't know

**Do you think it is important for patients**

**to have a good tolerance of the interface?**

EVA : not important |+++++| very important

**to get a satisfactory system to fix the interface ?**

EVA : not important |+++++| very important

**to be able to fix the interface by patient himself?**

EVA : not important |+++++| very important

**to be able to remove the interface by patient himself?**

EVA : not important |+++++| very important

**to be able to remove the interface by patient himself?**

EVA : not important |+++++| very important

**To use two different interfaces to alternate pressure points and prevent some complications? (Skin trouble...etc)?**

EVA : useless |+++++| very useful

**What kind of support do you prefer for ventilators on wheelchairs?**

a) ☐ support at the back of the WC

b) ☐ appropriate bag

c) ☐ rigid and protective bag

d) ☐ other, clarify :

**What is the use of a humidifier (water chamber) when patients are in a wheelchair?**

a) ☐ useful and not a problem

b) ☐ useful but problematic

c) ☐ useless but problematic

d) ☐ useless but not but not a problem

e) ☐ dangerous and therefore to prohibit

f) ☐ don't know

**What do you think of allowing the patient using a mouthpiece to control insufflations through a contactor in order to trigger or stop insufflation for instance ?**

EVA : not important |+++++| very important

**The ability to control ventilator through a contactor would also be a way to not deliver ventilation, on the face for instance, when patients are disconnected from the mouthpiece and extend battery life as well. What do you think?**

EVA : not important |+++++| very important

**Controlled insufflations could also be increased in order to allow inspiration of a bigger air volume at the time of cough test, or to replace Intermittent positive pressure ventilator (Bird), or just before each sip of food. What's your opinion?**

EVA : not important |+++++| very important

**Is it important to resort to a technical solution to improve speaking abilities with mechanical ventilation by tracheostomy?**

EVA: not important (0) to very important (10)

**Do you think one of these methods could help tracheostomized patients to speak in an easier way when ventilation is delivered? (several possible answers)**

- a) ☐ set a positive expiratory pressure on the ventilator      b) ☐ yes : a speaking valve  
c) ☐ yes: a prolongation of insufflations  
d) ☐ no      e) ☐ don't know

**Would it be important for patients to be able to trigger an alarm in order to warn people around or caregivers?**

EVA : not important | | | | | | | | | | very important

**Would it be important to get a remote control for the patient in order to change ventilator settings (in order to adapt to physiological conditions)?**

EVA : not important | | | | | | | | | | very important

**What are the important parameters you would like to see displayed on the screen?**

**On/ Off icon**

EVA: not important | | | | | | | | | | very important

**Battery discharging / charging icon**

EVA : not important | | | | | | | | | | very important

**2.24.1 What should be maximum time of charge for batteries?**

- a) From 4 to 12 hours

**As a minimum, how long a ventilator should run on battery?**

- a) From 4 to more than 12 hours

**What should be the maximum weight for a ventilator?**

- a) From 1 to 5 Kg

**What do you expect from a future ventilator? Rank by importance (1 = most important)**

Light  
Compact  
Quiet  
Long battery life  
Easy to adapt on a wheelchair

**Would you like a ventilator with the following features?**

- a) ☐ phone      b) ☐ alarm clock      c) ☐ MP3  
d) ☐ GPS      e) ☐ cinema      f) ☐ environment control

### Questionnaire for prescribers

**Among the following modes: volumetric (V mode), pressure (P mode) and pressure with minimum volume target (PV mode), which one of them do you usually recommend as a first preference for each following clinical situations :**

Duchenne muscular dystrophy starting nocturnal NIV

Duchenne muscular dystrophy with both nocturnal and daytime NIV

Duchenne muscular dystrophy with tracheostomy ventilation

Steinert starting nocturnal NIV

Severe spinal muscular atrophy with tracheostomy ventilation

**Among the following modes: controlled modes (C modes), assisted modes (A modes), assist control modes= backup rate (A/C modes), which one of them do you first recommend in the following clinical situations :**

Duchenne muscular dystrophy starting nocturnal NIV

Duchenne muscular dystrophy with both nocturnal and daytime NIV

Duchenne muscular dystrophy with tracheostomy ventilation

Steinert starting nocturnal NIV

Severe spinal muscular atrophy with tracheostomy ventilation

**In addition to the ventilator, do you prescribe any of the following for the same patient (several possible answers) ?**

- ☐ a second ventilator
- ☐ percussive ventilator
- ☐ intermittent positive pressure ventilator
- ☐ a Cough Assist

**Among the following interfaces: moulded nasal mask (MNM), industrial nasal mask (INM), nasal pillow (NP), full face mask (FFM), mouthpiece (MP) which one of them do you first recommend in the following clinical situations ? (several possible answers)**

Duchenne muscular dystrophy starting nocturnal NIV

Steinert starting nocturnal NIV

Spinal muscular atrophy starting nocturnal NIV

**Do you prescribe a humidification system for patients using NIV? If so, what kind?**

**Do you prescribe a humidification system for patients using tracheostomy ventilation? If so, what kind?**

## **Questionnaire for neuromuscular patients**

**For patients under NIV only :**

**How are you connected to the ventilator ? (several possible answers)**

With a :

- nasal masks
- facial masks
- nasal pillows,
- scuba
- mouthpiece

**Can you fit your ventilator interface yourself without help ?**

yes or no

**Can you disconnect yourself from your ventilator interface without help ?**

yes or no

**For all patients :**

**Your ventilator delivers :**

- an adjusted volume
- an adjusted pressure
- an adjusted pressure which can increase sometimes to allow a minimal volume

**Your ventilator delivers :**

- insufflations independently to your inspiratory effort
- insufflations which follow your inspiratory efforts
- insufflations at a minimal frequency, but it is possible for you to trigger insufflations by an inspiratory effort

**How do you feel the mechanical ventilation :**

- effective or not effective
- comfortable or not comfortable

**How do you feel the inspiratory effort necessary in order to be assisted by the ventilator ?**

- too hard
- comfortable
- too tiny

**When do you decide to increase the spontaneous respiratory frequency during mechanical ventilation ? (several possible answers)**

- during effort or exercise
- when speaking
- when needing air

**Do you use a humidification system during mechanical ventilation? If so, what kind? (several possible answers)**

- an artificial filter
- a non-heated humidifier
- a heated humidifier

**Did you experienced severe water inhalation in the airway when using a humidifier ?**  
yes or no

**Did you experienced severe water condensation in the limbs when using a humidifier ?**  
yes or no

**For patients using mechanical ventilation during daytime :**

**Are you able to disconnect from the ventilator more than 5 minutes ?**  
yes or no

**If yes do you feel better when you used it ?**  
yes or no

**And does diurnal ventilation improves:**

- daytime dyspnea : yes or no
- speech: yes or no
- fatigue: yes or no
- meal: yes or no
